# Supplementary material
Source: Royal Society of Chemistry journal article supplement (doi:10.1039/d6gc00720a)
Supplement: d6gc00720a1.pdf [file d6gc00720a1.pdf]

## Supplementary Information

### **Tunable hydrated deep eutectic solvents for efficient lignocellulose fractionation towards sustainable biorefineries**

Wei Liu,\* Yu Zhang,† Jinlong Feng,† Zhan Li, Huiwu Zhu, Jiayin Hu\* and Qingxi Hou

*State Key Laboratory of Bio-based Fiber Materials, China Textile Industry Key Laboratory of  
High-performance Fibers Wet-laid Nonwoven Materials, Tianjin Key Laboratory of Pulp &  
Paper, Tianjin University of Science and Technology, Tianjin 300457, China*

Corresponding authors' Email address: [weiliu@tust.edu.cn](mailto:weiliu@tust.edu.cn); [hujiayin@tust.edu.cn](mailto:hujiayin@tust.edu.cn)

† These authors contributed equally to this work.

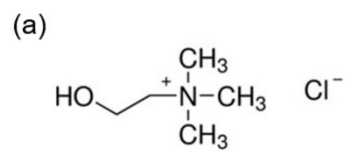

Choline Chloride (ChCl)

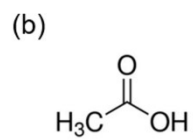

Acetic Acid (AA)

**Fig. S1** The chemical structures. (a) choline chloride. (b) acetic acid.

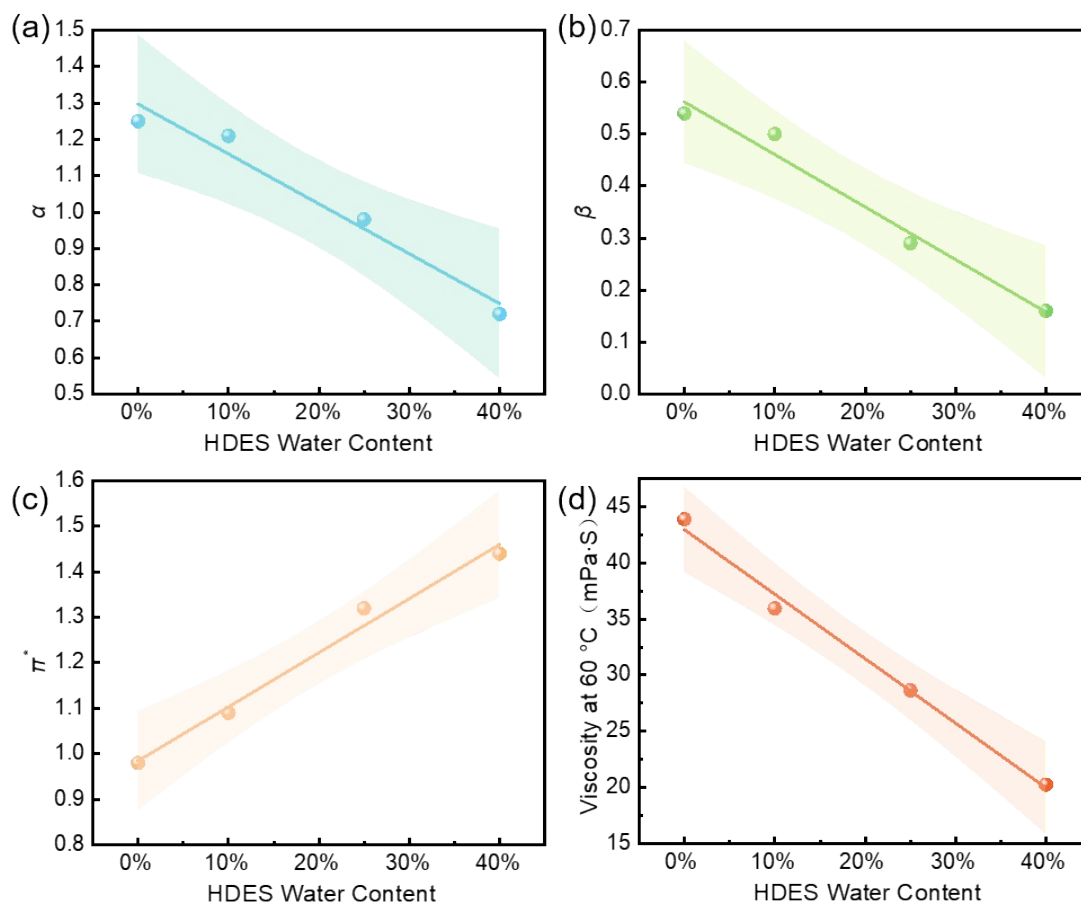

**Fig. S2** Linear fittings of (a)  $\alpha$ , (b)  $\beta$ , (c)  $\pi^*$ , (d) viscosity versus water content.

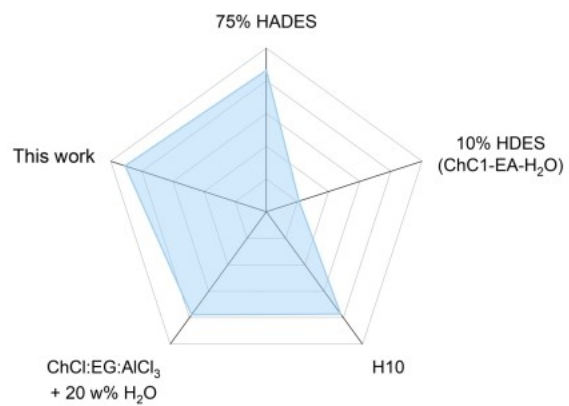

**Fig. S3** Comparison of lignin removal efficiency between this work and other works.<sup>1-4</sup>

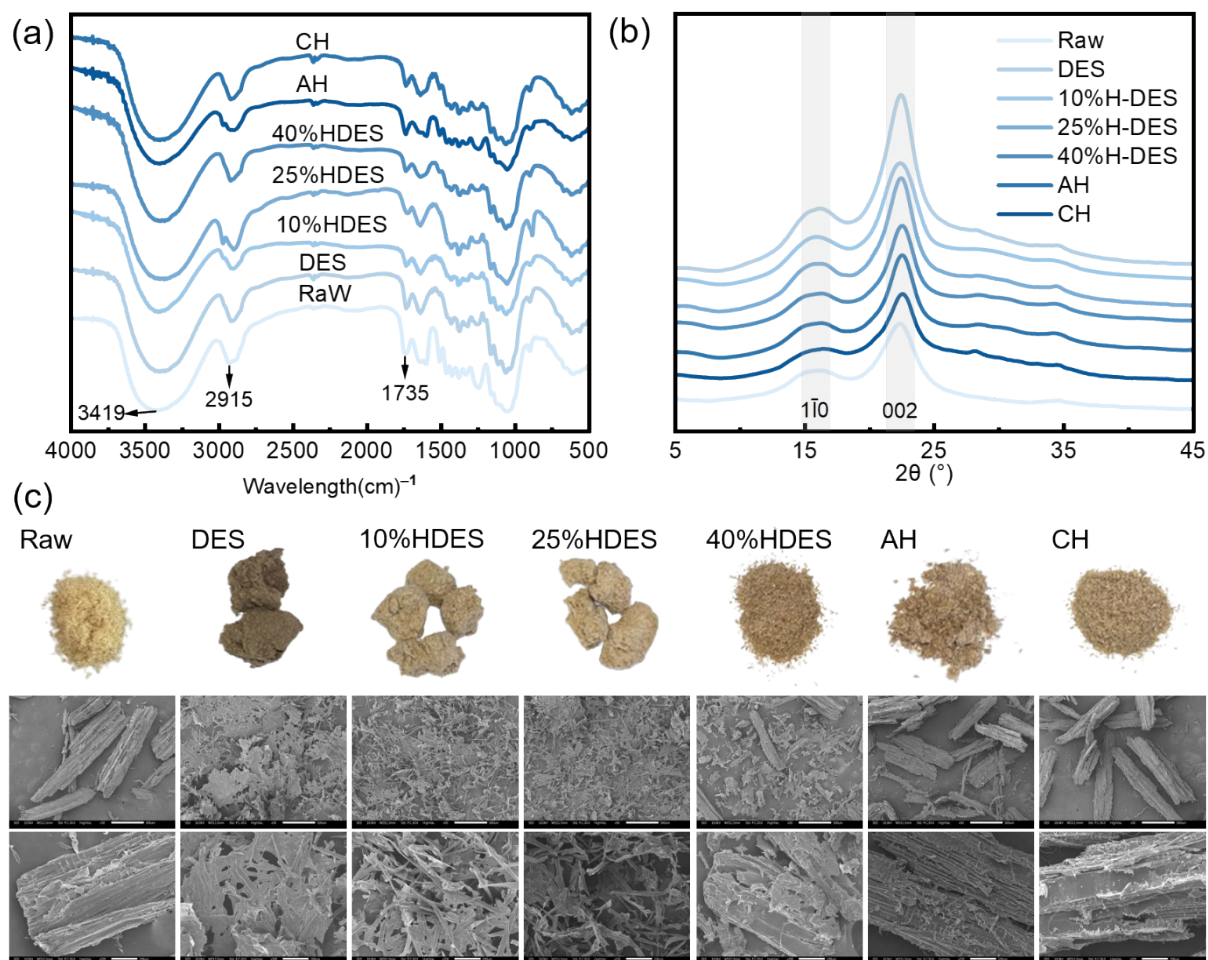

**Fig. S4** Chemical and structural changes of the solid residues after pretreatment. (a) FTIR spectra. (b) XRD patterns. (c) optical photographs and SEM images.

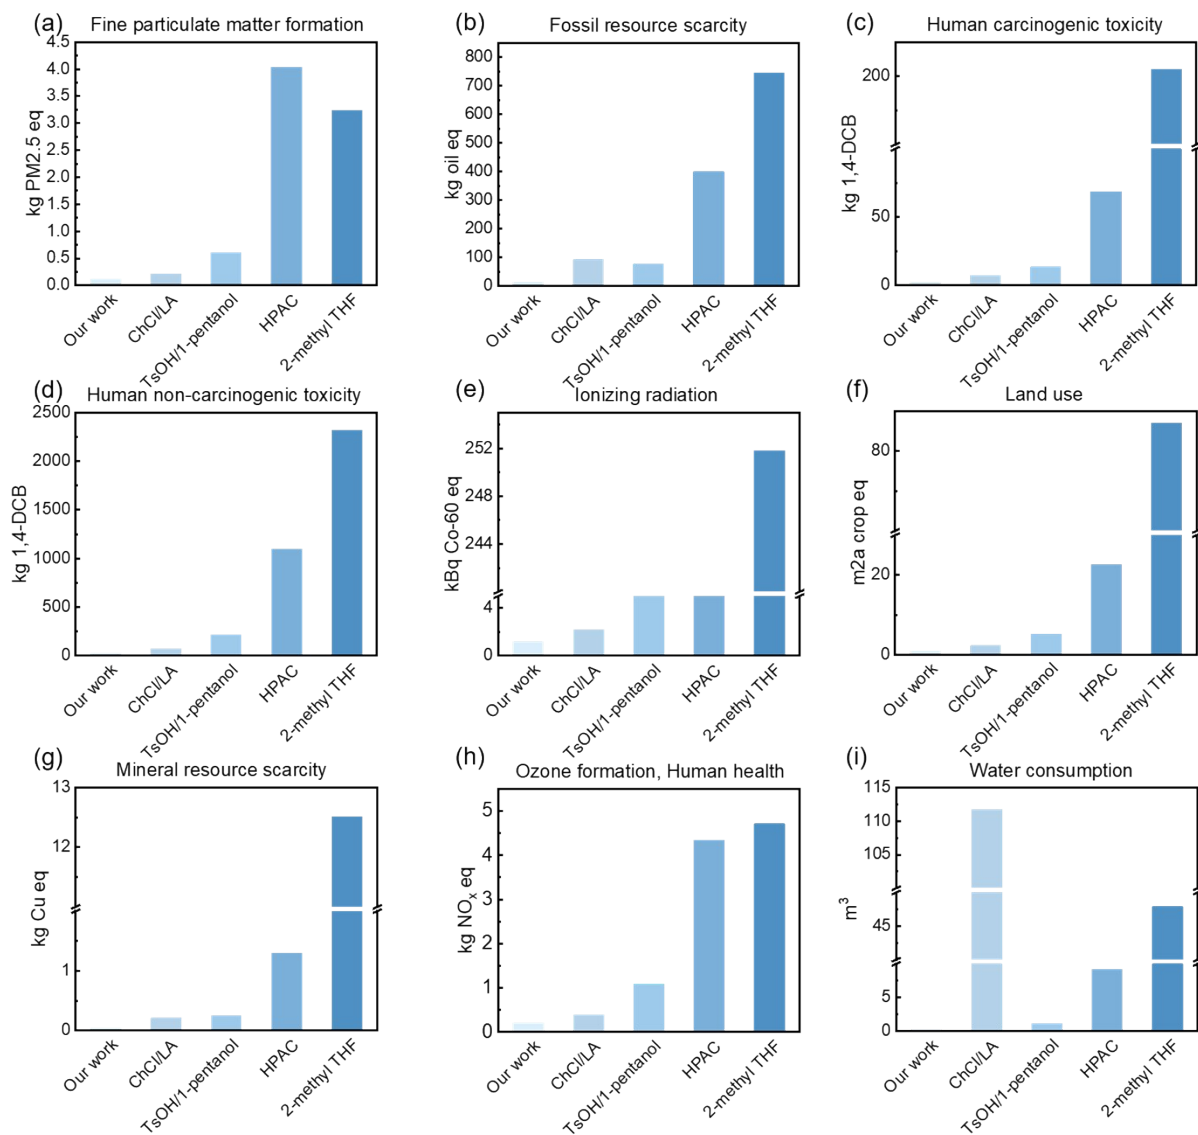

**Fig. S5** Comparative assessment of the environmental impacts of 25% HDES and conventional pretreatment solvents (ChCl/LA, TsOH/1-pentanol, HPAC, 2-methyl THF). (a) Fine particulate matter formation. (b) Fossil resource scarcity. (c) Human carcinogenic toxicity. (d) Human non-carcinogenic toxicity. (e) Ionizing radiation. (f) Land use. (g) Mineral resource scarcity. (h) Ozone formation, Human health. (i) Water consumption.

**Table1** The main characteristics of different solvents.

| Sample   | K-T             |                 |         | Viscosity at 60<br>°C (mPa·S) |
|----------|-----------------|-----------------|---------|-------------------------------|
|          | $\alpha$        | $\beta$         | $\pi^*$ |                               |
| DES      | 1.25            | 0.54            | 0.98    | 43.89                         |
| 10%-HDES | 1.21            | 0.50            | 1.09    | 35.95                         |
| 25%-HDES | 0.98            | 0.29            | 1.32    | 28.66                         |
| 40%-HDES | 0.72            | 0.16            | 1.44    | 20.23                         |
| AH       | 0.82            | ND <sup>a</sup> | 1.38    | 12.91                         |
| CH       | ND <sup>a</sup> | 0.26            | 1.53    | 15.16                         |

Note: ND, not detected.

**Table2** Pretreatment of 1 kg poplar wood for environmental impact.

|                                         | Unit                    | Total    | Sodium acetate | ChCl     | Deionized water | Ethanol  | AA       | Ultrasonication | Vacuum filtration | Oscillation | Freeze-drying | Hydrothermal | Centrifugation | Water bath stirring | Rotary evaporation | Waste water | Waste residue |
|-----------------------------------------|-------------------------|----------|----------------|----------|-----------------|----------|----------|-----------------|-------------------|-------------|---------------|--------------|----------------|---------------------|--------------------|-------------|---------------|
| Global warming                          | kg CO <sub>2</sub> eq   | 7.49E+01 | 7.17E-04       | 1.24E-01 | 1.70E-03        | 5.03E-02 | 6.11E-02 | 6.60E-01        | 4.46E-01          | 2.57E+01    | 4.22E+01      | 8.43E-01     | 6.88E-02       | 1.65E+00            | 2.97E+00           | 6.07E-06    | 1.53E-03      |
| Stratospheric ozone depletion           | kg CFC11 eq             | 1.62E-05 | 5.08E-10       | 3.65E-08 | 1.34E-09        | 5.16E-09 | 3.15E-08 | 1.42E-07        | 9.60E-08          | 5.55E-06    | 9.10E-06      | 1.82E-07     | 1.48E-08       | 3.56E-07            | 6.40E-07           | 2.25E-11    | 1.05E-10      |
| Ionizing radiation                      | kBq Co-60 eq            | 1.22E+00 | 6.53E-05       | 3.68E-03 | 1.34E-04        | 6.25E-04 | 4.75E-03 | 1.07E-02        | 7.21E-03          | 4.17E-01    | 6.84E-01      | 1.36E-02     | 1.11E-03       | 2.67E-02            | 4.81E-02           | 1.56E-06    | 2.65E-06      |
| Ozone formation, Human health           | kg NO <sub>x</sub> eq   | 2.07E-01 | 1.73E-06       | 2.25E-04 | 4.05E-06        | 1.15E-04 | 1.43E-04 | 1.83E-03        | 1.23E-03          | 7.13E-02    | 1.17E-01      | 2.33E-03     | 1.90E-04       | 4.57E-03            | 8.23E-03           | 2.60E-08    | 2.24E-07      |
| Fine particulate matter formation       | kg PM <sub>2.5</sub> eq | 1.15E-01 | 1.42E-06       | 1.56E-04 | 3.94E-06        | 5.02E-05 | 1.10E-04 | 1.02E-03        | 6.88E-04          | 3.97E-02    | 6.52E-02      | 1.30E-03     | 1.06E-04       | 2.55E-03            | 4.58E-03           | 1.70E-08    | 1.12E-07      |
| Ozone formation, Terrestrial ecosystems | kg NO <sub>x</sub> eq   | 2.08E-01 | 1.81E-06       | 2.41E-04 | 4.10E-06        | 1.32E-04 | 1.53E-04 | 1.83E-03        | 1.24E-03          | 7.15E-02    | 1.17E-01      | 2.34E-03     | 1.91E-04       | 4.58E-03            | 8.25E-03           | 2.64E-08    | 2.28E-07      |
| Terrestrial acidification               | kg SO <sub>2</sub> eq   | 2.59E-01 | 2.70E-06       | 3.50E-04 | 6.31E-06        | 1.37E-04 | 2.27E-04 | 2.28E-03        | 1.54E-03          | 8.89E-02    | 1.46E-01      | 2.91E-03     | 2.38E-04       | 5.70E-03            | 1.03E-02           | 5.15E-08    | 2.37E-07      |
| Freshwater                              | kg P eq                 | 1.48E-01 | 3.26E-06       | 2.73E-04 | 8.33E-06        | 1.99E-04 | 2.38E-04 | 1.30E-03        | 8.80E-03          | 5.08E-02    | 8.34E-01      | 1.66E-03     | 1.36E-04       | 3.26E-03            | 5.87E-03           | 1.81E-08    | 3.44E-07      |

|                                 |                          |          |          |          |          |          |          |          |          |          |          |          |          |          |          |          |          |
|---------------------------------|--------------------------|----------|----------|----------|----------|----------|----------|----------|----------|----------|----------|----------|----------|----------|----------|----------|----------|
| eutrophication                  |                          | 02       | 07       | 05       | 07       | 05       | 05       | 04       | 05       | 03       | 03       | 04       | 05       | 04       | 04       | 08       | 08       |
| Marine eutrophication           | kg N eq                  | 9.67E-04 | 2.50E-08 | 4.54E-05 | 6.37E-08 | 4.09E-07 | 1.54E-06 | 8.12E-06 | 5.48E-06 | 3.17E-04 | 5.20E-04 | 1.04E-05 | 8.46E-07 | 2.03E-05 | 3.66E-05 | 1.02E-07 | 1.03E-06 |
| Terrestrial ecotoxicity         | kg 1,4-DCB               | 6.79E+01 | 1.95E-03 | 2.31E-01 | 3.47E-03 | 8.99E-02 | 1.58E-01 | 5.96E-01 | 4.02E-01 | 2.33E+01 | 3.82E+01 | 7.61E-01 | 6.21E-02 | 1.49E+00 | 2.68E+00 | 2.94E-05 | 7.57E-05 |
| Freshwater ecotoxicity          | kg 1,4-DCB               | 2.36E+00 | 2.23E-05 | 2.33E-03 | 4.97E-05 | 7.62E-04 | 1.77E-03 | 2.08E-02 | 1.41E-02 | 8.12E-01 | 1.33E+00 | 2.66E-02 | 2.17E-03 | 5.21E-02 | 9.37E-02 | 7.41E-07 | 8.68E-04 |
| Marine ecotoxicity              | kg 1,4-DCB               | 3.01E+00 | 3.15E-05 | 3.35E-03 | 6.93E-05 | 1.10E-03 | 2.51E-03 | 2.65E-02 | 1.79E-02 | 1.04E+00 | 1.70E+00 | 3.39E-02 | 2.77E-03 | 6.64E-02 | 1.19E-01 | 9.70E-07 | 1.14E-03 |
| Human carcinogenic toxicity     | kg 1,4-DCB               | 2.31E+00 | 2.82E-05 | 2.84E-03 | 1.96E-04 | 1.14E-03 | 2.11E-03 | 2.04E-02 | 1.38E-02 | 7.95E-01 | 1.30E+00 | 2.60E-02 | 2.12E-03 | 5.09E-02 | 9.17E-02 | 1.58E-06 | 3.13E-05 |
| Human non-carcinogenic toxicity | kg 1,4-DCB               | 2.40E+01 | 6.54E-04 | 7.16E-02 | 1.26E-03 | 2.52E-02 | 5.26E-02 | 2.11E-01 | 1.42E-01 | 8.21E+00 | 1.35E+01 | 2.69E-01 | 2.19E-02 | 5.26E-01 | 9.47E-01 | 3.62E-05 | 1.86E-02 |
| Land use                        | m <sup>2</sup> a crop eq | 9.09E-01 | 1.31E-05 | 9.03E-04 | 2.49E-05 | 6.34E-04 | 1.04E-03 | 8.02E-03 | 5.41E-03 | 3.13E-01 | 5.13E-01 | 1.02E-02 | 8.36E-04 | 2.01E-02 | 3.61E-02 | 3.05E-07 | 6.03E-06 |
| Mineral resource scarcity       | kg Cu eq                 | 4.06E-02 | 2.02E-06 | 2.37E-04 | 7.31E-06 | 1.01E-04 | 1.70E-04 | 3.55E-04 | 2.39E-04 | 1.38E-02 | 2.27E-02 | 4.53E-04 | 3.69E-05 | 8.86E-04 | 1.60E-03 | 2.54E-07 | 8.64E-08 |
| Fossil resource scarcity        | kg oil eq                | 1.47E+01 | 3.44E-04 | 8.01E-02 | 4.30E-04 | 3.68E-02 | 3.66E-02 | 1.28E-01 | 8.67E-02 | 5.01E+00 | 8.22E+00 | 1.64E-01 | 1.34E-02 | 3.21E-01 | 5.78E-01 | 1.21E-06 | 1.61E-05 |
| Water consumption               | m <sup>3</sup>           | 1.91E-01 | 1.86E-05 | 1.61E-03 | 1.12E-03 | 4.03E-04 | 1.60E-03 | 1.64E-03 | 1.11E-03 | 6.41E-02 | 1.05E-01 | 2.10E-03 | 1.71E-04 | 4.11E-03 | 7.40E-03 | #####    | 6.62E-07 |

## References

- 1 Q. Hu, Y. Xu, Y. Wang, W. Gong, C.-Y. Ma, S. Li and J.-L. Wen, *Int. J. Biol. Macromol.*, 2024, **264**, 130702.
- 2 Y. Xing, Y. He, C. Wang, L. Shao and G. Yang, *Ind. Crop. Prod.*, 2025, **229**, 121014.
- 3 Y. Xu, C.-Y. Ma, S.-C. Sun, C. Zhang, J.-L. Wen and T.-Q. Yuan, *Bioresour. Technol.*, 2023, **387**, 129679.
- 4 Q. Bu, Y. Yue, B. Wang, J. Bai, L. Jiao, M. Wang and J. Xu, *Waster Manage.*, 2025, **208**, 115161.
